# Supplementary material
Source: MDPI journal article supplement (https://www.mdpi.com/2071-1050/14/1/6)
Supplement: s1 [file s1 › sustainability-1492814-supplementary.pdf]

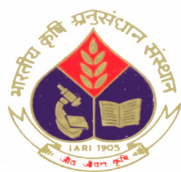

**ICAR-INDIAN AGRICULTURAL RESEARCH INSTITUTE  
NEW DELHI, INDIA-110012**

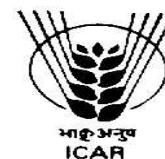

**SURVEY SCHEDULE:**

Climate-change induced drought impacts, adaptation and mitigation measures in semi-arid pastoral and agricultural watersheds

**General Information**

|                       |  |                                 |  |
|-----------------------|--|---------------------------------|--|
| <b>Village</b>        |  | <b>Name of the Investigator</b> |  |
| <b>Tehsil/Taluk</b>   |  | <b>Date of Interview</b>        |  |
| <b>District/Block</b> |  | <b>State</b>                    |  |

**Family Details of the Household**

1. Name: \_\_\_\_\_
2. Gender: M/F
3. Education: Illiterate/Literate/ (Primary/Secondary/Higher Secondary/College)
4. Family type: Nuclear/Joint/Extended
5. Family size:
  - i. Total No. of family members: Adult (Male).....Adult (Female).....Children.....
  - ii. No. of people engaged in farming: (a) Fully.....(b) Partially.....

6. Means of livelihood

| <b>Occupation</b>                 | <b>Yes/No</b> | <b>Annual Income (in Rs)</b> |
|-----------------------------------|---------------|------------------------------|
| Agriculture                       |               |                              |
| Agriculture + allied activities   |               |                              |
| Agriculture+ Service              |               |                              |
| Service                           |               |                              |
| Non-farm activities               |               |                              |
| Agriculture + Non-farm activities |               |                              |

7. What are the household's expenditures?

| <b>S.N.</b> | <b>Areas</b>                                                                                                                                                                  | <b>Expenditure (Rs)</b> | <b>Source (Savings/Loan)</b> |
|-------------|-------------------------------------------------------------------------------------------------------------------------------------------------------------------------------|-------------------------|------------------------------|
| 1.          | Food (last month)                                                                                                                                                             |                         |                              |
| 2.          | Agricultural investment (last year) <ul style="list-style-type: none"> <li>• Machinery or wells:</li> <li>• Fertilizers:</li> <li>• Pesticides:</li> <li>• Labour:</li> </ul> |                         |                              |
| 3.          | Education (last year)                                                                                                                                                         |                         |                              |
| 4.          | Health (last year)                                                                                                                                                            |                         |                              |

8. Land related Information (area in acres)

| Type of Land      | Irrigated | Rainfed | Source of Irrigation* | Rental Value (Rs/acre) | Soil type |
|-------------------|-----------|---------|-----------------------|------------------------|-----------|
| Total owned land  |           |         |                       |                        |           |
| Leased-in         |           |         |                       |                        |           |
| Leased -out       |           |         |                       |                        |           |
| Uncultivated land |           |         |                       |                        |           |
| Total             |           |         |                       |                        |           |

\*Open well =1, Tube well=2, Tank =3, Canal = 4, others=5

9. House ownership: Own/Joint/Rented/Lease
10. House type: Pucca/Semi pucca/ Kuchha (Area..... Value.....)
11. Electric connectivity (Yes/No)
12. Telephone connectivity (Yes/No)
13. Road connectivity (Yes/No)
14. Homestead/Kitchen garden: Yes/No (Area..... Value.....)
15. Cattle shed: Yes/No (Area..... Value.....)

16. Livestock Information:

| Sl. No. | Type         | Number      |          | Present value | Income (per month in Rs) |
|---------|--------------|-------------|----------|---------------|--------------------------|
|         |              | Local breed | Improved |               |                          |
| 1.      | Bulls        |             |          |               |                          |
| 2.      | Oxen         |             |          |               |                          |
| 3.      | Local cow    |             |          |               |                          |
| 4.      | Improved cow |             |          |               |                          |
| 5.      | Sheep        |             |          |               |                          |
| 6.      | Goat         |             |          |               |                          |
| 7.      | Buffalo      |             |          |               |                          |
| 8.      | Poultry      |             |          |               |                          |
| 9.      | Pig          |             |          |               |                          |
| 10.     | Calves       |             |          |               |                          |
| 11.     | Heifers      |             |          |               |                          |

17. Household and farm assets:

| Asset          | Asset type                                    | Total Number of assets | Value |
|----------------|-----------------------------------------------|------------------------|-------|
| Communication  | Radio                                         |                        |       |
|                | Television (colour with Dish or without Dish) |                        |       |
|                | Phone (land or cell)                          |                        |       |
|                | Smart cell phone                              |                        |       |
|                | Feature cell phone                            |                        |       |
| Transportation | Vehicle (car/van/jeep)                        |                        |       |
|                | Motor bike                                    |                        |       |
|                | Bicycle                                       |                        |       |

|                        |                               |  |  |
|------------------------|-------------------------------|--|--|
|                        | Jugad                         |  |  |
| <b>Farm tools</b>      | Cart                          |  |  |
|                        | Tractor                       |  |  |
|                        | Plough (wooden)               |  |  |
|                        | Plough (iron)                 |  |  |
|                        | Cultivator (Tractor drawn)    |  |  |
|                        | Seeder/Weeder                 |  |  |
|                        | Pesticide sprayer             |  |  |
|                        | Wheel barrow                  |  |  |
|                        | Threshing machine             |  |  |
|                        | Organic manure pit            |  |  |
|                        | Diesel/Electric pump          |  |  |
|                        | Fodder cutting machine        |  |  |
|                        | Sprinkler/Drip irrigation set |  |  |
|                        | Pipeline system               |  |  |
| <b>Household items</b> | Refrigerator                  |  |  |
|                        | Water tank                    |  |  |
|                        | Sewing machine                |  |  |
|                        | Electric Fan                  |  |  |
|                        | Desert Cooler                 |  |  |
|                        | LPG                           |  |  |
|                        | Stove (Kerosene)              |  |  |
|                        | Gober gas                     |  |  |
|                        | In house water connection     |  |  |
|                        | Flour mill                    |  |  |
|                        | Solar lamp/cooker             |  |  |
|                        | Others (specify)              |  |  |

#### 18. Social participation

| <b>Social organization</b>                                               | <b>Member</b> | <b>Office bearer</b> |
|--------------------------------------------------------------------------|---------------|----------------------|
| Farmers' club                                                            |               |                      |
| SHG/FIG/CIG                                                              |               |                      |
| Farmers' association/Cooperatives/FPCs/Water Users' Group or association |               |                      |
| Farmer Advisory Committee of ATMA                                        |               |                      |
| Village development Committee                                            |               |                      |
| Gram Sabha/ Village Panchayat                                            |               |                      |

19. Credit behaviour of farmers

| Sl.No. | Source of credit   | Accessibility (Easy/Difficult) | Frequency of taking loan | Purpose | Loan outstanding |
|--------|--------------------|--------------------------------|--------------------------|---------|------------------|
| a.     | Moneylenders       |                                |                          |         |                  |
| b.     | Friends/ Relatives |                                |                          |         |                  |
| c.     | SHG                |                                |                          |         |                  |
| d.     | Cooperatives       |                                |                          |         |                  |
| e.     | Bank               |                                |                          |         |                  |
| f.     | Others             |                                |                          |         |                  |

20. Accessibility to civic amenities

| Amenities                                                    | Accessible (Yes/No) | Distance from home |
|--------------------------------------------------------------|---------------------|--------------------|
| Drinking water supply                                        |                     |                    |
| Primary Health Centre                                        |                     |                    |
| Primary School                                               |                     |                    |
| Secondary School                                             |                     |                    |
| College                                                      |                     |                    |
| Post Office                                                  |                     |                    |
| Bank                                                         |                     |                    |
| Cooperative Society                                          |                     |                    |
| Mandi                                                        |                     |                    |
| Market                                                       |                     |                    |
| Agriculture input dealer shop                                |                     |                    |
| Custom Hire Centre                                           |                     |                    |
| Community Centre                                             |                     |                    |
| Entertainment centre(theatre, cinema hall, community fair)   |                     |                    |
| KVK                                                          |                     |                    |
| Department of Agriculture                                    |                     |                    |
| Soil testing lab                                             |                     |                    |
| Veterinary centre                                            |                     |                    |
| Farm machinery repair shop                                   |                     |                    |
| Agro-processing centre (Rice mill, pulse/oilseed mills, etc) |                     |                    |

21. Source of Extension Information

| S.N. | Source of information | Extent of use |            |           |        |       |
|------|-----------------------|---------------|------------|-----------|--------|-------|
|      |                       | Always        | Most often | Sometimes | Rarely | Never |
| 1.   | Neighbour             |               |            |           |        |       |
| 2.   | Progressive farmer    |               |            |           |        |       |
| 3.   | Relatives             |               |            |           |        |       |
| 4.   | Friends               |               |            |           |        |       |

|     |                                     |  |  |  |  |  |
|-----|-------------------------------------|--|--|--|--|--|
| 5.  | Village leader                      |  |  |  |  |  |
| 6.  | Panchayat member/<br>paradhan       |  |  |  |  |  |
| 7.  | KVK scientist                       |  |  |  |  |  |
| 8.  | NGO/ SHG leader                     |  |  |  |  |  |
| 9.  | Govt extension personnel            |  |  |  |  |  |
| 10. | Social worker                       |  |  |  |  |  |
| 11. | Kissanmela                          |  |  |  |  |  |
| 12. | Banks                               |  |  |  |  |  |
| 13. | Pesticides/seed/fertilizer<br>depot |  |  |  |  |  |
| 14. | Television                          |  |  |  |  |  |
| 15. | Radio                               |  |  |  |  |  |
| 16. | Newspaper                           |  |  |  |  |  |
| 17. | Mobile advisory                     |  |  |  |  |  |

## 22. Details of cropping pattern

| Season/Crop            | Variety  | Area (acre) |         | Source<br>of<br>irrigation<br>Code* | Total<br>Production<br>(qtls) |           | Quantity<br>Sold (qtls) |               | Average Price<br>(Rs/ctl) |               |
|------------------------|----------|-------------|---------|-------------------------------------|-------------------------------|-----------|-------------------------|---------------|---------------------------|---------------|
|                        |          | Irrigated   | Rainfed |                                     | Main                          | By<br>pro | Main                    | By<br>product | Main                      | By<br>product |
| Kharif                 |          |             |         |                                     |                               |           |                         |               |                           |               |
| 1.                     | Improved |             |         |                                     |                               |           |                         |               |                           |               |
|                        | Local    |             |         |                                     |                               |           |                         |               |                           |               |
| 2                      | Improved |             |         |                                     |                               |           |                         |               |                           |               |
|                        | Local    |             |         |                                     |                               |           |                         |               |                           |               |
| 3                      | Improved |             |         |                                     |                               |           |                         |               |                           |               |
|                        | Local    |             |         |                                     |                               |           |                         |               |                           |               |
| 4                      | Improved |             |         |                                     |                               |           |                         |               |                           |               |
|                        | Local    |             |         |                                     |                               |           |                         |               |                           |               |
| Rabi                   |          |             |         |                                     |                               |           |                         |               |                           |               |
| 1                      | Improved |             |         |                                     |                               |           |                         |               |                           |               |
|                        | Local    |             |         |                                     |                               |           |                         |               |                           |               |
| 2                      | Improved |             |         |                                     |                               |           |                         |               |                           |               |
|                        | Local    |             |         |                                     |                               |           |                         |               |                           |               |
| 3                      | Improved |             |         |                                     |                               |           |                         |               |                           |               |
|                        | Local    |             |         |                                     |                               |           |                         |               |                           |               |
| Summer                 |          |             |         |                                     |                               |           |                         |               |                           |               |
|                        | Improved |             |         |                                     |                               |           |                         |               |                           |               |
|                        | Local    |             |         |                                     |                               |           |                         |               |                           |               |
|                        | Improved |             |         |                                     |                               |           |                         |               |                           |               |
|                        | Local    |             |         |                                     |                               |           |                         |               |                           |               |
| Annuals<br>/Perennials |          |             |         |                                     |                               |           |                         |               |                           |               |
| 1.                     |          |             |         |                                     |                               |           |                         |               |                           |               |
| 2.                     |          |             |         |                                     |                               |           |                         |               |                           |               |

23. Access to irrigation sources Yes/No

- Own well/Borrowed or shared from other neighboring well owners/canal/River/Community or village Pond/Lift irrigation/ Dam
- Charges for irrigation water: Rs.....per hour/acre
- Depth of water table.....

| 2018 | 2012 | 2010 | 2007 | 2005 |
|------|------|------|------|------|
|      |      |      |      |      |

- How often there is conflict on water in your village?: Most Often/Sometimes/Never
- Do you have any village committee to monitor water allocation or use or for water related conflict resolution? Yes/No
- If yes, provide its name, function and mechanism.
- Do you have access or do you participate in community initiatives for water harvesting in your village/area? Yes/No

(Farm pond/Check dam/Well/Water harvest/Community tank/Any other)

24. Climate variability/change perceptions (local indicators of climate change)

| Sl.No. | Changes                        | Over the last 10 years what changes have you noticed? (Yes=1, No=0) | What adaptation measures did you adopt? Choose from Adaptation code * |
|--------|--------------------------------|---------------------------------------------------------------------|-----------------------------------------------------------------------|
| 1.     | No changes in rain             |                                                                     |                                                                       |
| 2.     | Less rain                      |                                                                     |                                                                       |
| 3.     | More rain                      |                                                                     |                                                                       |
| 4.     | Frequent droughts              |                                                                     |                                                                       |
| 5.     | Frequent floods                |                                                                     |                                                                       |
| 6.     | Delay in start of rainy season |                                                                     |                                                                       |
| 7.     | Rainy season end sooner        |                                                                     |                                                                       |
| 8.     | Unusual rain                   |                                                                     |                                                                       |
| 9.     | Temperature increase           |                                                                     |                                                                       |
| 10.    | Temperature decrease           |                                                                     |                                                                       |

\*Change in crop variety=1, Decrease irrigation=2, Increase irrigation=3, Form pond construct=4, Dig new borewell=5, Stop irrigation=6, Reduce livestock=7, Keep improved livestock=8, Migration to other area=9, Lease out land=10, Purchase water=11, Plant shade trees=12, Change sowing time=13, Others=14 (specify)

25 . Access to weather information

| Sources                          | Onset of monsoon/delay in monsoon/scanty monsoon | How frequently is forecast information available? | Did you use advice and information about when to plant/sow crops from these sources? |
|----------------------------------|--------------------------------------------------|---------------------------------------------------|--------------------------------------------------------------------------------------|
|                                  | Yes=1, No=0                                      | Daily=1, Weekly=2, Monthly=3, Seasonal=4          | Yes=1, No=0                                                                          |
| KrishiVigyan Kendra              |                                                  |                                                   |                                                                                      |
| TV                               |                                                  |                                                   |                                                                                      |
| All India Radio                  |                                                  |                                                   |                                                                                      |
| Mobile based advisory            |                                                  |                                                   |                                                                                      |
| Community radio                  |                                                  |                                                   |                                                                                      |
| News Paper                       |                                                  |                                                   |                                                                                      |
| Neighbours/Relatives/Lead farmer |                                                  |                                                   |                                                                                      |
| Gram Panchayat/Gram Sabha        |                                                  |                                                   |                                                                                      |
| Others (specify)                 |                                                  |                                                   |                                                                                      |

26. In the past one month, how many types of help did you provide or receive from others? Please tick

| Sl. No. | Various Helps                            | Help given | Help received |
|---------|------------------------------------------|------------|---------------|
| 1.      | Land preparation                         |            |               |
| 2.      | Planting crops                           |            |               |
| 3.      | Harvesting                               |            |               |
| 4.      | Looking after livestock                  |            |               |
| 5.      | Attending to sick animal                 |            |               |
| 6.      | Building/maintenance of house            |            |               |
| 7.      | During sickness                          |            |               |
| 8.      | Borrowing money                          |            |               |
| 9.      | Borrowing or providing seeds             |            |               |
| 10.     | During religious rites                   |            |               |
| 11.     | During death                             |            |               |
| 12.     | Buy items from markets                   |            |               |
| 13.     | Writing and reading letters/applications |            |               |
| 14.     | Mediating conflicts                      |            |               |
| 15.     | During marriage                          |            |               |

27. In the past one season/year did you borrow (get money from others on loan) or lent (give out money on loan) money?

| Sl. No. | Activities   | No. of times |
|---------|--------------|--------------|
| 1.      | Borrow money |              |
| 2.      | Lent money   |              |

28. If your household wanted to borrow money, whom would you approach first?

Please **tick**

| Sl. No | Source                        | Tick |
|--------|-------------------------------|------|
| 1.     | Relatives                     |      |
| 2.     | Friends                       |      |
| 3.     | Village fund (community fund) |      |
| 4.     | Rural credit cooperative      |      |
| 5.     | Local/Private money lender    |      |
| 6.     | Bank                          |      |

29. In the last 12 months, how many household members in your household were ill that they had to miss work or school? (Put numbers in the appropriate box)

| Sl. No | Frequency           | No. of members who missed school | No. of members who missed work |
|--------|---------------------|----------------------------------|--------------------------------|
| 1.     | Never               |                                  |                                |
| 2.     | Once or twice       |                                  |                                |
| 3.     | Once a month        |                                  |                                |
| 4.     | A few times a month |                                  |                                |
| 5.     | More than a week    |                                  |                                |
| 6.     | More than a month   |                                  |                                |
| 7.     | Whole year          |                                  |                                |

30. In the past one year, how many members suffered from the following diseases?

| Sl. No. | Disease     | Males (No.) | Females (No.) | Months of exposure (which months) |
|---------|-------------|-------------|---------------|-----------------------------------|
| 1.      | Malaria     |             |               |                                   |
| 2.      | Typhoid     |             |               |                                   |
| 3.      | Cholera     |             |               |                                   |
| 4.      | Dysentery   |             |               |                                   |
| 5.      | Diarrhea    |             |               |                                   |
| 6.      | Common cold |             |               |                                   |
| 7.      | Fever       |             |               |                                   |

31. What percentage of your household food grains need is met by your own farm land in a year?

| Percentage | For a year with enough rainfall | For a year with not enough rainfall |
|------------|---------------------------------|-------------------------------------|
| 0-25%      |                                 |                                     |
| 26-50%     |                                 |                                     |
| 51-75%     |                                 |                                     |
| 76-100%    |                                 |                                     |

32. Please specify about daily food consumption pattern in your family

| S.N.  | Food items                    | Quantity | Value (in Rs) |
|-------|-------------------------------|----------|---------------|
| i.    | Foodgrains                    |          |               |
| ii.   | Pulses                        |          |               |
| iii.  | Oils                          |          |               |
| iv.   | Sugar                         |          |               |
| v.    | Meat/Chicken                  |          |               |
| vi.   | Fish                          |          |               |
| vii.  | Egg                           |          |               |
| viii. | Milk                          |          |               |
| ix.   | Milk products (curd/Cheese)   |          |               |
| x.    | Vegetables                    |          |               |
| xi.   | Fruits                        |          |               |
| xii.  | Processed products(Home)      |          |               |
| xiii. | Processed products(Purchased) |          |               |
| xiv.  | Tea/Coffee/Cold Drinks        |          |               |

33. How often you or family members have to migrate for livelihood in times of adversaries?

Yes/No

| Place            | Tick mark | Period     | Tick mark |
|------------------|-----------|------------|-----------|
| Within District  |           | Few months |           |
| Outside district |           | Six months |           |
| Outside state    |           | Year       |           |

34. Have you adopted crop diversification in last few years?

Yes/No

| Diversified crop | Percent area | Reasons |
|------------------|--------------|---------|
|                  |              |         |
|                  |              |         |
|                  |              |         |
|                  |              |         |

35. Please specify the social/agricultural support mechanism of Govt. and Non govt. and International organizations in your area.

| Scheme/ Projects | Beneficiary (Yes/No) | Nature/Extent of benefit. |
|------------------|----------------------|---------------------------|
|                  |                      |                           |
|                  |                      |                           |
|                  |                      |                           |
|                  |                      |                           |
|                  |                      |                           |
|                  |                      |                           |

36. Have you participated in any extension activity in last five years?

Yes/No

| S.N. | Extension activity | Year | Knowledge/Technology learnt |
|------|--------------------|------|-----------------------------|
| 1.   | Training           |      |                             |
| 2.   | Demonstration      |      |                             |

|    |                      |  |  |
|----|----------------------|--|--|
| 3. | Exposure Visit       |  |  |
| 4. | Farmers Field school |  |  |
| 5. | KrishakGosthi        |  |  |

37. Are you aware of insurance? Yes/No

38. Have you taken any insurance policy? Yes/No

39. Are you registered under Kisan Credit Card policy? Yes/No

40. Do you have any bank account under Jan DhanYojana? Yes/No

41. What are the major constraints in adaptation to climate change?

- a.
- b.
- c.
- d.
- e.

42. What is the extent of social cohesiveness in your village?

(Very High, High, So-So, Low, very Low)

43. What is the level of trust among the community members?

(Very High, High, So-So, Low, very Low)

44. Does social norm in your village facilitate innovation diffusion?

(Most often, Seldom, Never)

45. Concerning agriculture and adaptation do you feel that you are particularly lacking in certain types of information? Yes/No

**Tick mark the areas**

- a. Weather
- b. Cropping (seeds, fertilizers, pesticides)
- c. Market, prices
- d. Health
- e. Government programmes on subsidies

46. In your opinion you are among the .....of farmers to adopt any innovation in your village?

(a) The first 1% (b) First 10% (c) First 25% (d) First 50% (e) Last 50%

#### **SURVEY SCHEDULE PREPARED BY:**

**L. Muralikrishnan<sup>1</sup>, R.N. Padaria<sup>1</sup>, Anil K. Choudhary<sup>2</sup> and Anchal Dass<sup>2</sup>**

<sup>1</sup>Division of Agricultural Extension, ICAR-Indian Agricultural Research Institute, New Delhi, 110012, India; muralikrishnan@iari.res.in (L.M.); rabindra@iari.res.in (R.N.P.)

<sup>2</sup>Division of Agronomy, ICAR-Indian Agricultural Research Institute, New Delhi, 110012, India; anil.chaudhary@icar.gov.in (A.K.C.); anchaldass@iari.res.in (A.D.)
